# Supplementary material
Source: Springer Nature journal article supplement (https://www.springermedizin.de/resource/supplementary/12885_2010_2897_MOESM4_ESM.pdf/9462248)

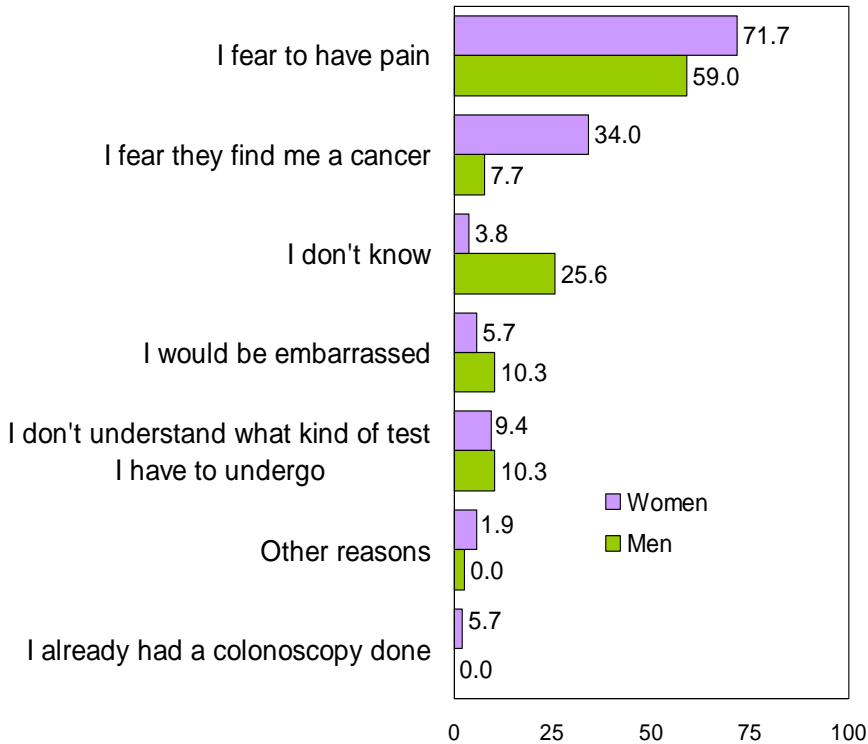

Supplement: MOESM4 [file 9462248]
